# Supplementary material
Source: PubMed Central journal article supplement (PMC6022281)
Supplement: NIHMS945747-supplement-Supplemental_1.pdf [file NIHMS945747-supplement-Supplemental_1.pdf]

Table S1.

*Model fit statistics for each country compared to all other countries*

| Model                           | Reference Model | Chi Squared Difference Testing |           |          |                |                   | RMSEA | CFI   | TLI   |
|---------------------------------|-----------------|--------------------------------|-----------|----------|----------------|-------------------|-------|-------|-------|
|                                 |                 | $\chi^2$                       | <i>df</i> | <i>P</i> | $\Delta\chi^2$ | <i>P</i> $\Delta$ |       |       |       |
| <b>Colombia vs. all others</b>  |                 |                                |           |          |                |                   |       |       |       |
| 1. Configural                   |                 | 2589.75                        | 180       | 0.00     | --             | --                | 0.075 | 0.946 | 0.937 |
| 2. Metric                       | 1               | 3466.36                        | 194       | 0.00     | 876.61         | 0.00              | 0.000 | 1.000 | 1.003 |
| 3. Scalar                       | 2               | 4552.84                        | 223       | 0.00     | 1086.48        | 0.00              | 0.095 | 0.732 | 0.688 |
| <b>Indonesia vs. all others</b> |                 |                                |           |          |                |                   |       |       |       |
| 1. Configural                   |                 | 1436.99                        | 130       | 0.00     | --             | --                | 0.065 | 0.965 | 0.958 |
| 2. Metric                       | 1               | 1961.47                        | 142       | 0.00     | 433.41         | 0.00              | 0.074 | 0.951 | 0.946 |
| 3. Scalar                       | 2               | 3412.70                        | 167       | 0.00     | 1251.57        | 0.00              | 0.091 | 0.912 | 0.918 |
| <b>Dohuk vs. all others</b>     |                 |                                |           |          |                |                   |       |       |       |
| 1. Configural                   |                 | 1949.57                        | 180       | 0.00     | --             | --                | 0.064 | 0.959 | 0.952 |
| 2. Metric                       | 1               | 1940.62                        | 194       | 0.00     | 149.90         | 0.00              | 0.062 | 0.959 | 0.956 |
| 3. Scalar                       | 2               | 2635.48                        | 223       | 0.00     | 688.96         | 0.00              | 0.068 | 0.944 | 0.947 |
| <b>Rwanda vs. all others</b>    |                 |                                |           |          |                |                   |       |       |       |
| 1. Configural                   |                 | 2236.71                        | 180       | 0.00     | --             | --                | 0.069 | 0.948 | 0.940 |
| 2. Metric                       | 1               | 2381.78                        | 194       | 0.00     | 207.74         | 0.00              | 0.069 | 0.945 | 0.941 |
| 3. Scalar                       | 2               | 2242.39                        | 223       | 0.00     | 238.65         | 0.00              | 0.062 | 0.949 | 0.952 |
| <b>Thailand vs. all others</b>  |                 |                                |           |          |                |                   |       |       |       |
| 1. Configural                   |                 | 2571.79                        | 180       | 0.00     | --             | --                | 0.075 | 0.941 | 0.931 |
| 2. Metric                       | 1               | 3637.81                        | 194       | 0.00     | 973.97         | 0.00              | 0.087 | 0.915 | 0.908 |
| 3. Scalar                       | 2               | 4394.69                        | 223       | 0.00     | 894.95         | 0.00              | 0.089 | 0.897 | 0.903 |
| <b>S. Iraq vs. all others</b>   |                 |                                |           |          |                |                   |       |       |       |
| 1. Configural                   |                 | 2173.88                        | 180       | 0.00     | --             | --                | 0.068 | 0.949 | 0.941 |
| 2. Metric                       | 1               | 2245.12                        | 194       | 0.00     | 120.21         | 0.00              | 0.067 | 0.948 | 0.944 |
| 3. Scalar                       | 2               | 2132.73                        | 223       | 0.00     | 174.05         | 0.00              | 0.060 | 0.952 | 0.954 |
| <b>Uganda vs. all others</b>    |                 |                                |           |          |                |                   |       |       |       |

|               |   |         |     |      |        |      |       |       |       |
|---------------|---|---------|-----|------|--------|------|-------|-------|-------|
| 1. Configural |   | 2605.33 | 180 | 0.00 | --     | --   | 0.075 | 0.945 | 0.935 |
| 2. Metric     | 1 | 3136.62 | 194 | 0.00 | 479.33 | 0.00 | 0.080 | 0.933 | 0.927 |
| 3. Scalar     | 2 | 2982.13 | 223 | 0.00 | 264.60 | 0.00 | 0.072 | 0.937 | 0.941 |

**Erbil/Sulaimaniya vs. all others**

|               |   |         |     |      |        |      |       |       |       |
|---------------|---|---------|-----|------|--------|------|-------|-------|-------|
| 1. Configural |   | 2435.71 | 180 | 0.00 | --     | --   | 0.073 | 0.946 | 0.937 |
| 2. Metric     | 1 | 2534.91 | 194 | 0.00 | 156.81 | 0.00 | 0.071 | 0.944 | 0.939 |
| 3. Scalar     | 2 | 3195.91 | 223 | 0.00 | 674.10 | 0.00 | 0.075 | 0.928 | 0.932 |

---

Table S2.

Standardize factor loadings for each country compared to all other countries

| Item        | Colombia vs. others |           | Indonesia vs. others |           | Dohuk vs. others |           | Rwanda vs. others |           | Thailand vs. others |           | S. Iraq vs. others |           | Uganda vs. others |           | Erbil/ Sulaimaniya vs. others |           |
|-------------|---------------------|-----------|----------------------|-----------|------------------|-----------|-------------------|-----------|---------------------|-----------|--------------------|-----------|-------------------|-----------|-------------------------------|-----------|
|             | $\lambda$           | $\lambda$ | $\lambda$            | $\lambda$ | $\lambda$        | $\lambda$ | $\lambda$         | $\lambda$ | $\lambda$           | $\lambda$ | $\lambda$          | $\lambda$ | $\lambda$         | $\lambda$ | $\lambda$                     | $\lambda$ |
|             | Col                 | Others    | Ind                  | Others    | Dohuk            | Others    | Rwanda            | Others    | Thai                | Others    | S.Iraq             | Others    | Uganda            | Others    | Erbil/Suli                    | Others    |
| Hopeless    | 0.67                | 0.70      | 0.71                 | 0.72      | 0.57             | 0.70      | 0.65              | 0.70      | 0.72                | 0.71      | 0.87               | 0.70      | 0.63              | 0.71      | 0.71                          | 0.70      |
| Crying      | 0.62                | 0.63      | 0.60                 | 0.65      | 0.21             | 0.66      | 0.57              | 0.63      | 0.61                | 0.65      | 0.65               | 0.66      | 0.61              | 0.65      | 0.54                          | 0.66      |
| Sad         | 0.75                | 0.75      | 0.71                 | 0.78      | 0.64             | 0.79      | 0.81              | 0.76      | 0.84                | 0.76      | 0.86               | 0.78      | 0.71              | 0.78      | 0.77                          | 0.78      |
| Lonely      | 0.70                | 0.71      | 0.76                 | 0.72      | 0.56             | 0.73      | 0.74              | 0.72      | 0.76                | 0.71      | 0.83               | 0.72      | 0.65              | 0.74      | 0.63                          | 0.74      |
| Lost sex    | 0.47                | 0.50      | --                   | --        | 0.33             | 0.51      | 0.35              | 0.52      | 0.55                | 0.46      | 0.55               | 0.50      | 0.42              | 0.52      | 0.50                          | 0.50      |
| No interest | 0.45                | 0.72      | 0.70                 | 0.64      | 0.49             | 0.63      | 0.35              | 0.63      | 0.69                | 0.64      | 0.83               | 0.63      | 0.66              | 0.63      | 0.82                          | 0.61      |
| Low energy  | 0.55                | 0.62      | 0.60                 | 0.63      | 0.49             | 0.60      | 0.63              | 0.61      | 0.75                | 0.55      | 0.77               | 0.60      | 0.60              | 0.60      | 0.56                          | 0.60      |
| Appetite    | 0.50                | 0.55      | 0.57                 | 0.57      | 0.45             | 0.54      | 0.63              | 0.53      | 0.54                | 0.53      | 0.68               | 0.53      | 0.54              | 0.53      | 0.52                          | 0.54      |
| Sleep       | 0.57                | 0.63      | 0.56                 | 0.64      | 0.50             | 0.61      | 0.63              | 0.60      | 0.76                | 0.57      | 0.77               | 0.61      | 0.64              | 0.60      | 0.48                          | 0.63      |
| Suicide     | 0.58                | 0.55      | 0.77                 | 0.56      | 0.59             | 0.52      | 0.69              | 0.53      | 0.20                | 0.64      | 0.61               | 0.55      | 0.49              | 0.54      | 0.58                          | 0.53      |
| Trapped     | 0.59                | 0.62      | 0.65                 | 0.55      | 0.59             | 0.54      | 0.79              | 0.52      | 0.72                | 0.58      | 0.81               | 0.54      | 0.58              | 0.57      | 0.63                          | 0.54      |
| Worry       | 0.54                | 0.71      | --                   | --        | 0.48             | 0.71      | 0.54              | 0.67      | 0.85                | 0.63      | 0.70               | 0.69      | 0.62              | 0.70      | 0.58                          | 0.71      |
| Self-blame  | 0.49                | 0.61      | 0.58                 | 0.57      | 0.43             | 0.57      | 0.45              | 0.56      | 0.67                | 0.58      | 0.71               | 0.57      | 0.33              | 0.59      | 0.63                          | 0.56      |
| Effort      | 0.43                | 0.69      | 0.71                 | 0.64      | 0.51             | 0.66      | 0.73              | 0.64      | 0.73                | 0.63      | 0.84               | 0.65      | 0.71              | 0.65      | 0.65                          | 0.67      |
| Worthless   | 0.62                | 0.71      | 0.81                 | 0.64      | 0.43             | 0.65      | 0.77              | 0.65      | 0.67                | 0.65      | 0.83               | 0.64      | 0.67              | 0.66      | 0.66                          | 0.65      |

Table S3.

Category Characteristic Curves for items with DIF in Colombia

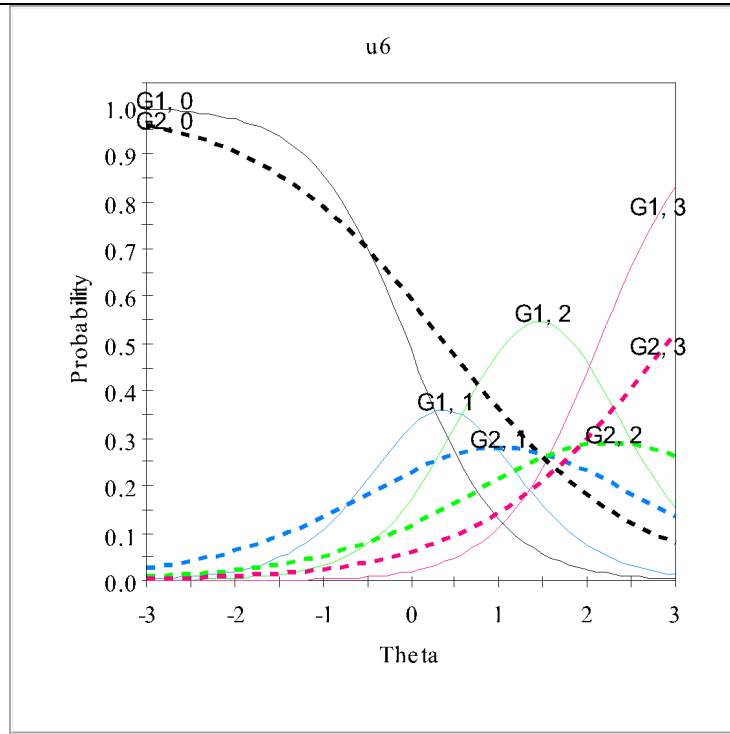

No interest

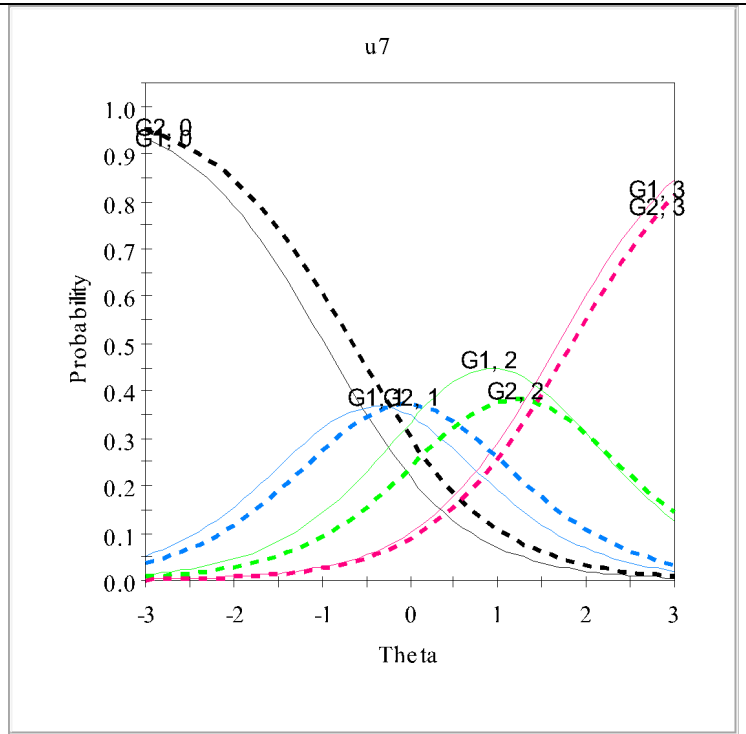

Low energy

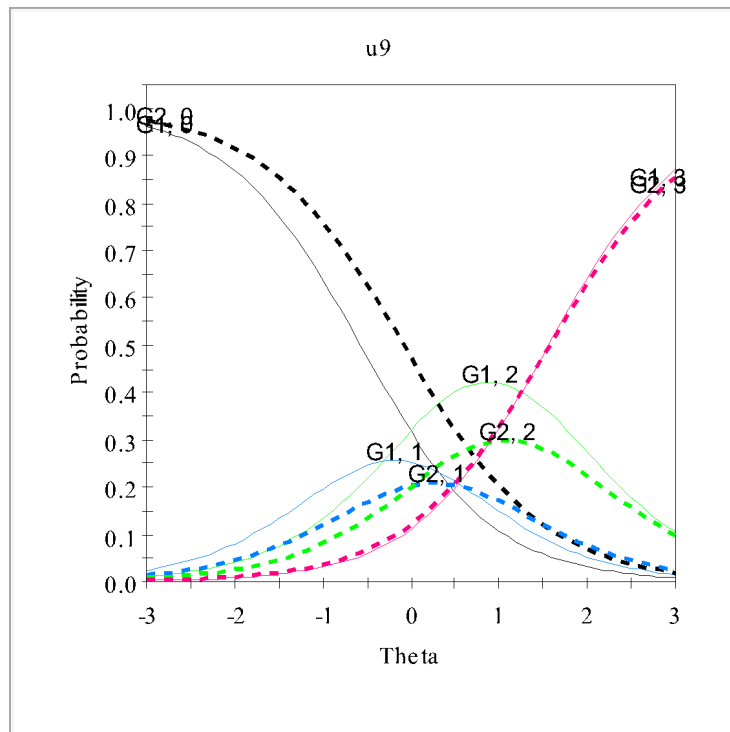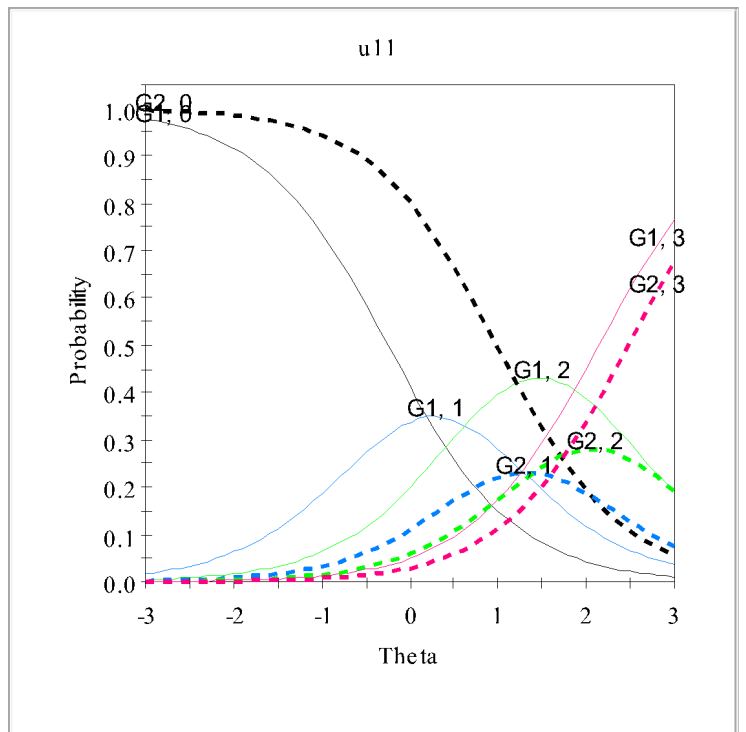

Sleep

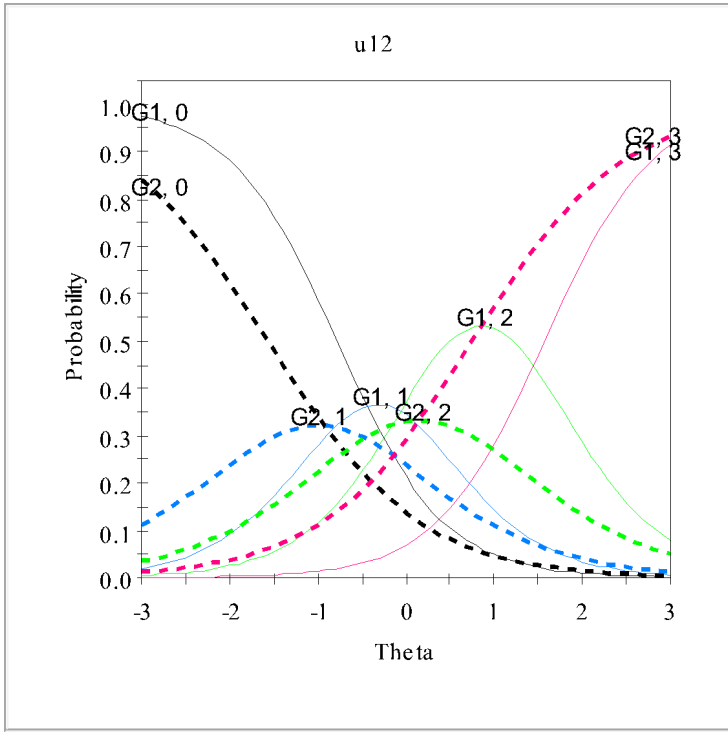

Trapped

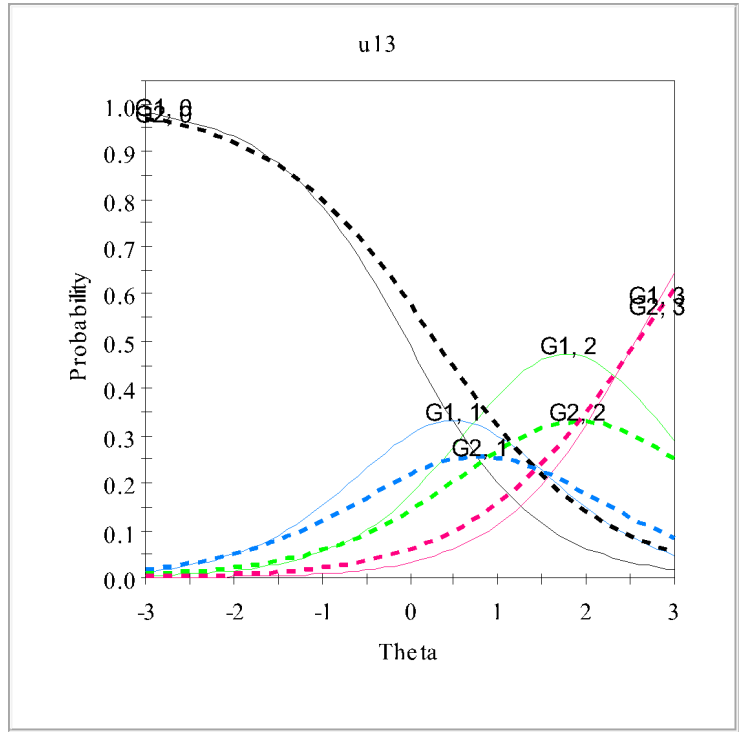

Worry

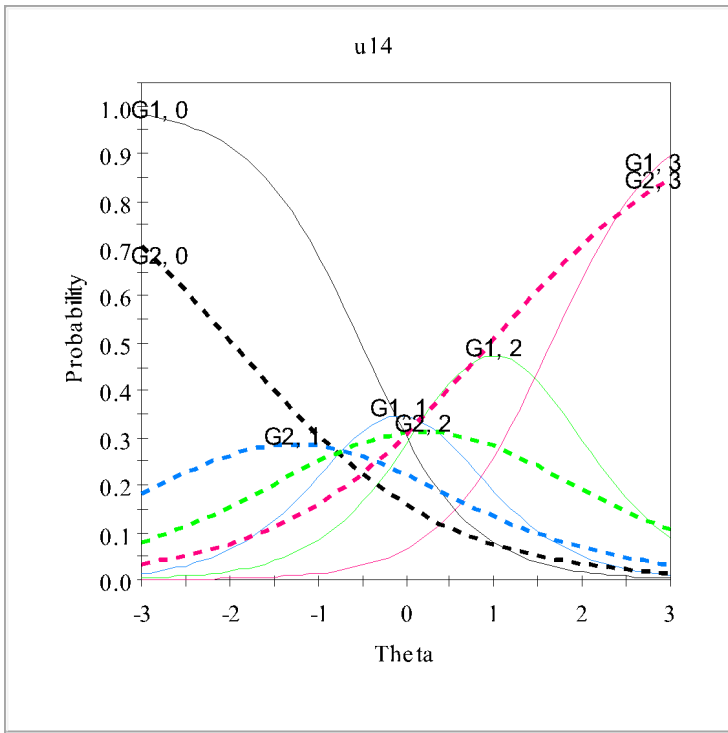

Self-blame

Effort

G1 = All others (solid lines); G2 = Colombia (dashed lines); 0,1,2,3 correspond to categorical responses



Table S4.

Category Characteristic Curves for items with DIF in Indonesia

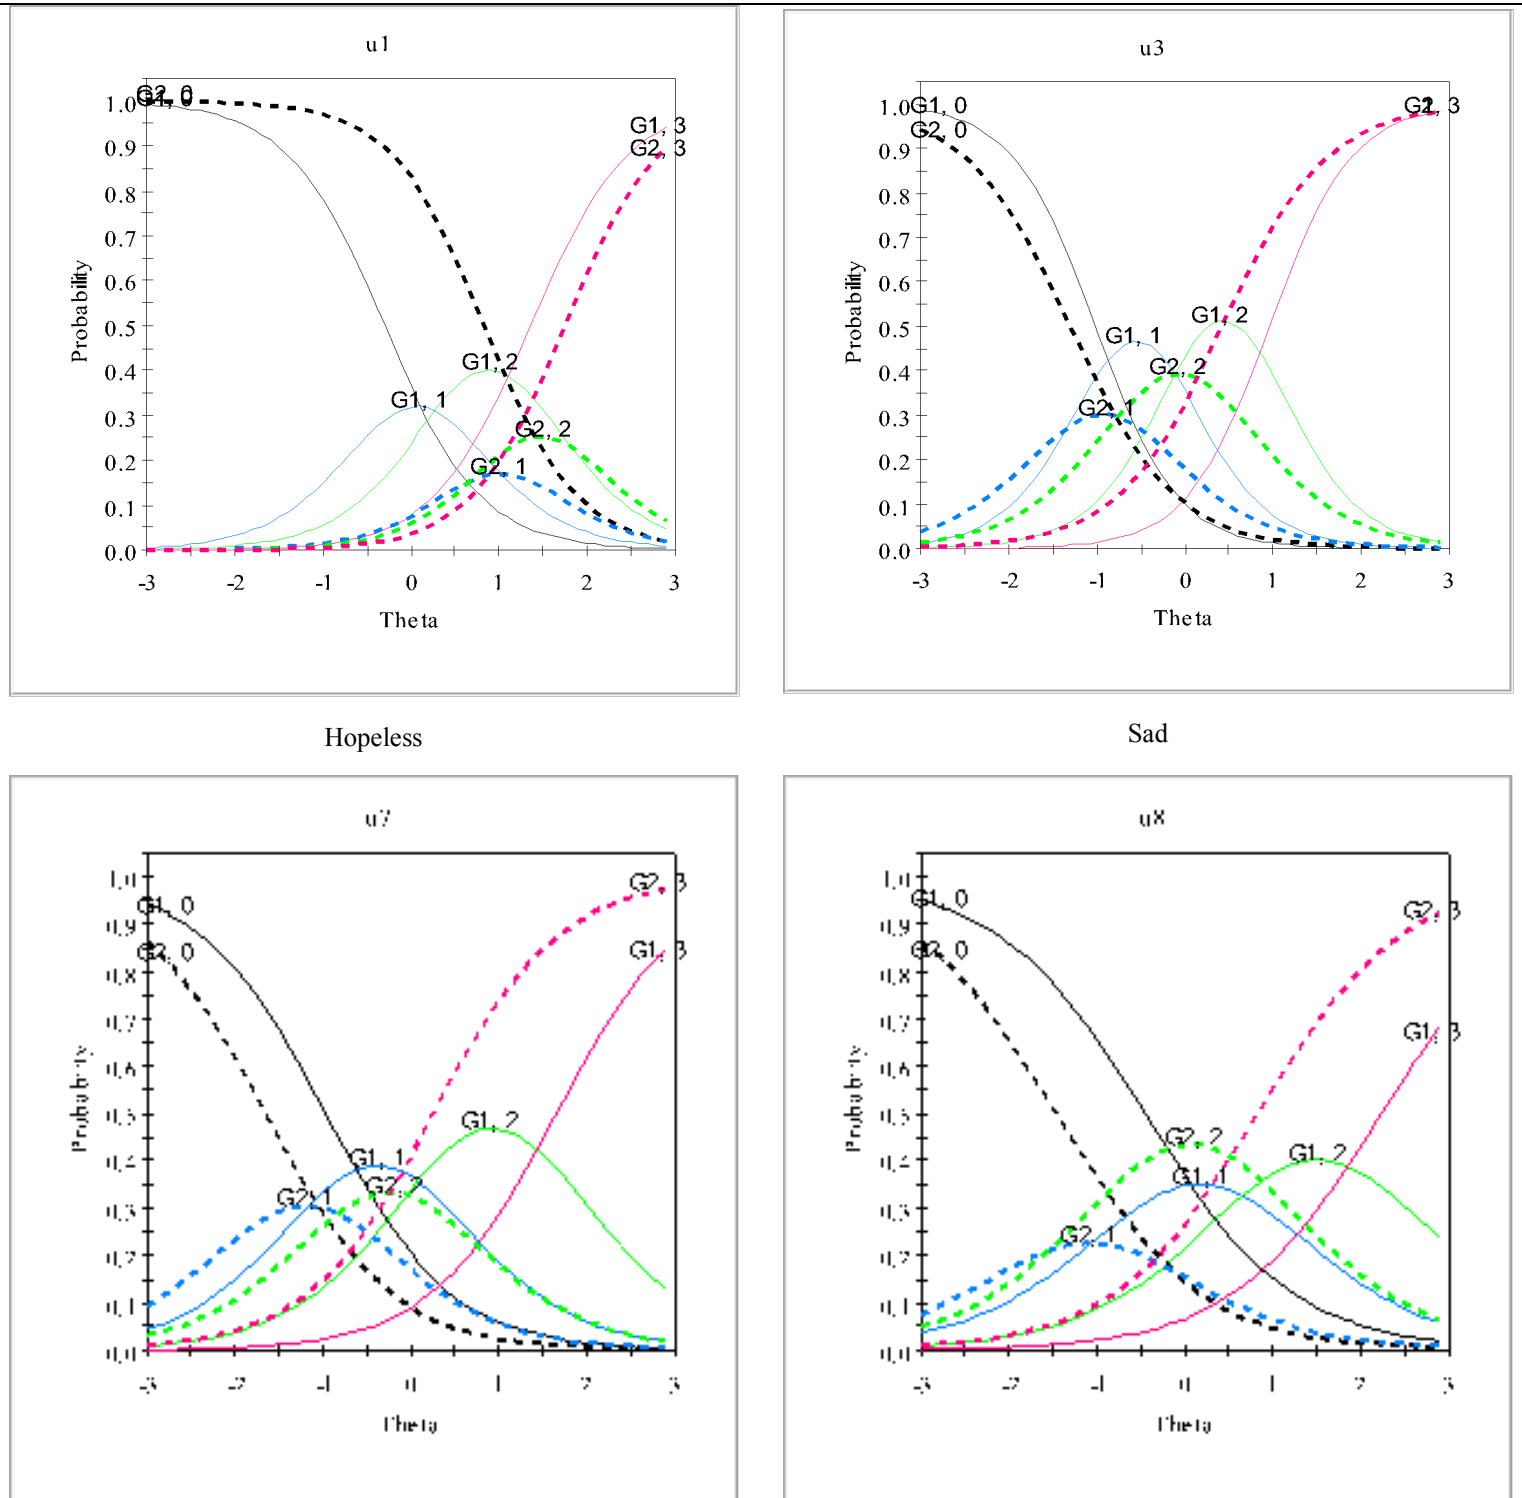

Low energy

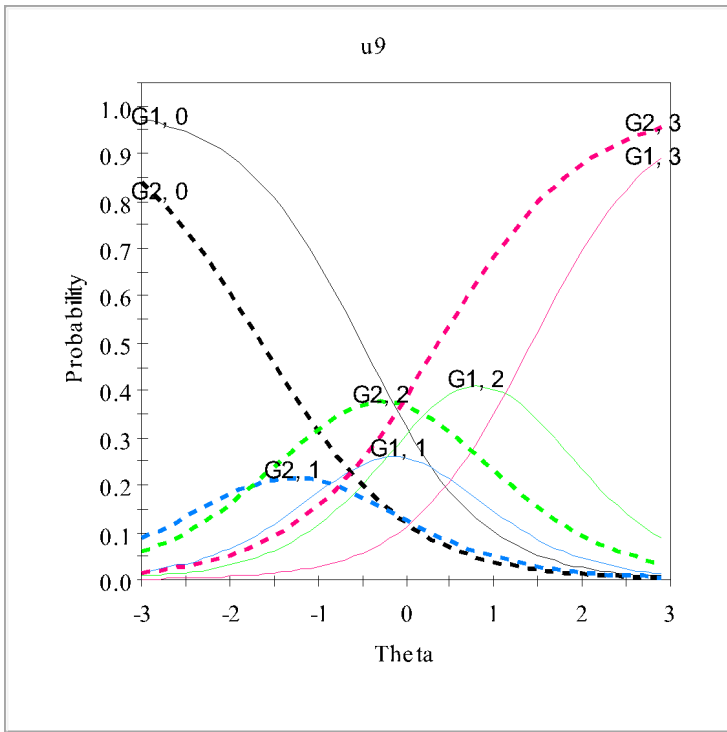

Appetite

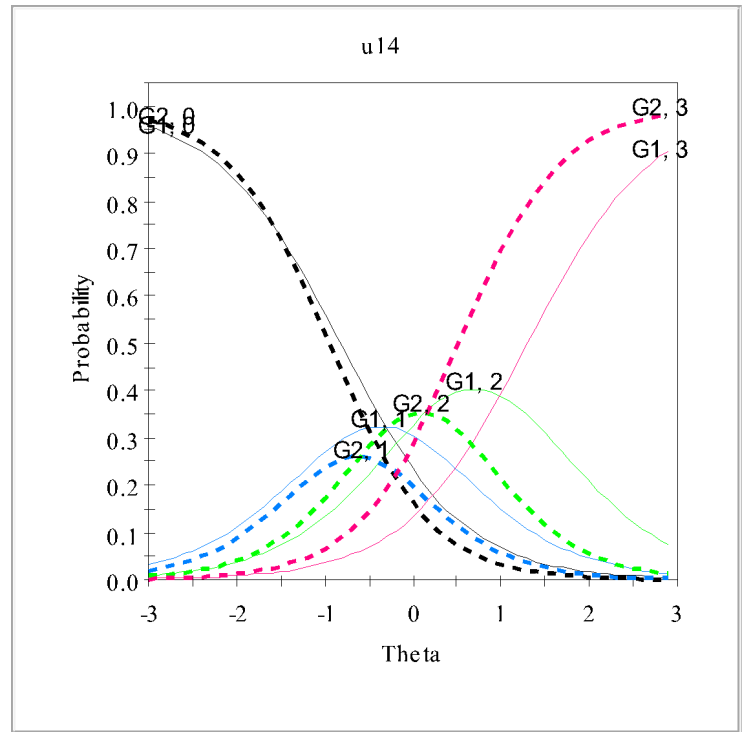

Sleep

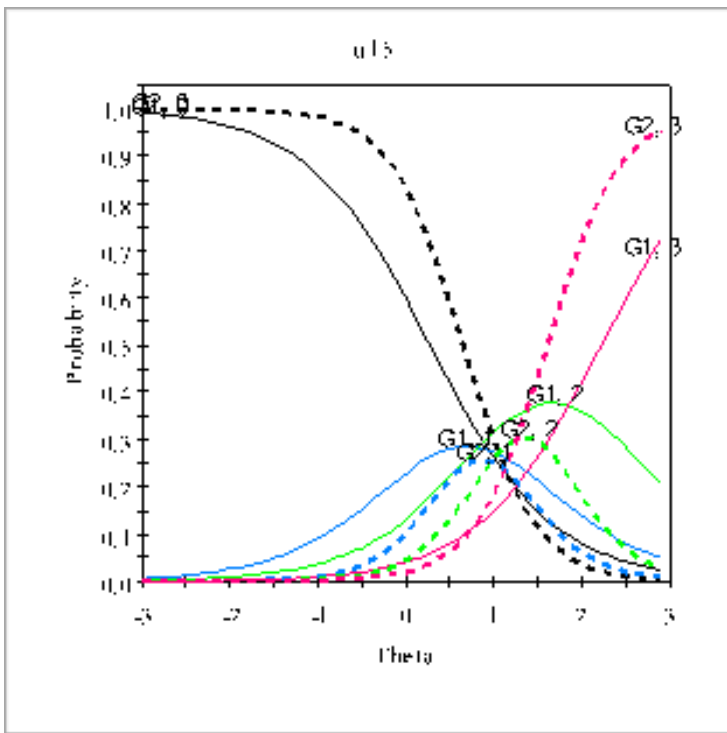

Effort

Worthlessness

G1 = All others (solid lines); G2 = Indonesia (dashed lines); 0,1,2,3 correspond to categorical responses





Table S5.

Category Characteristic Curves for items with DIF in Dohuk

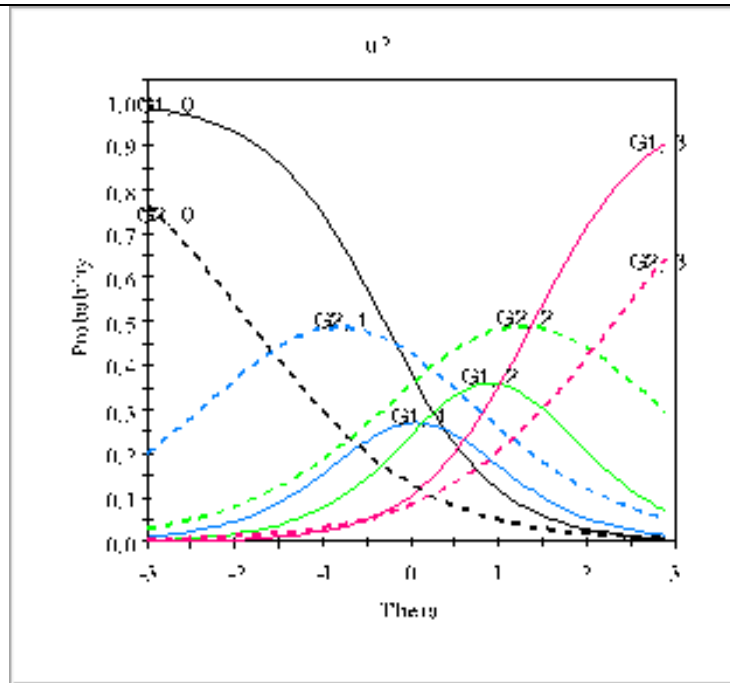

Crying

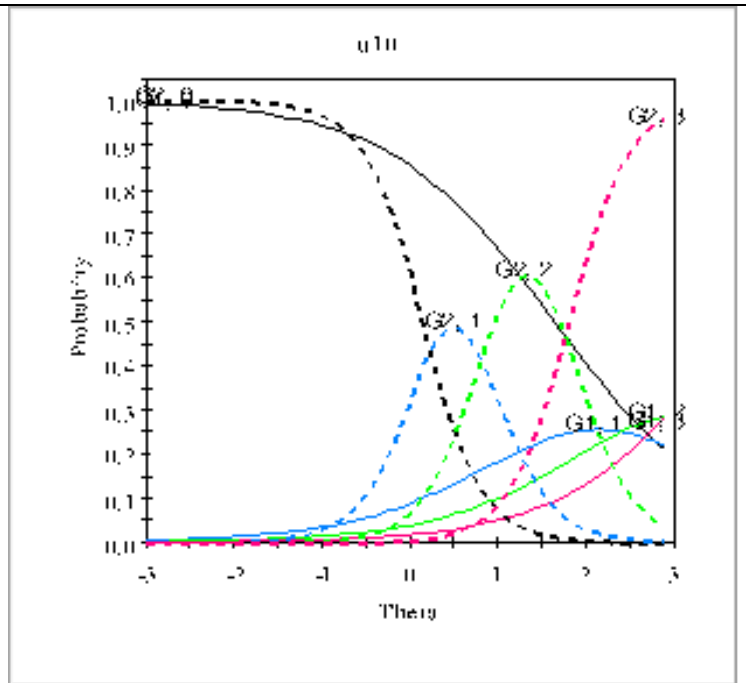

Suicide

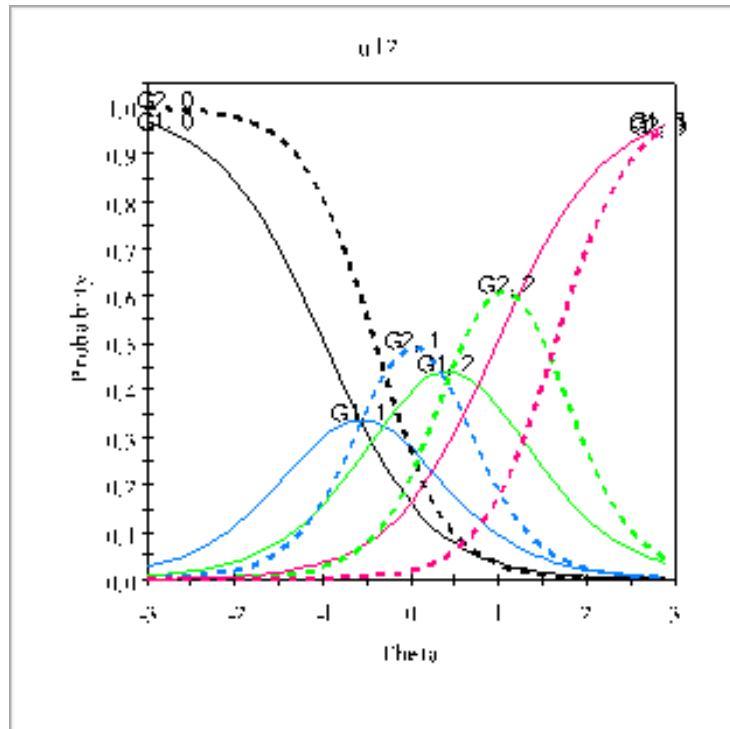

Worry

---

G1 = All others (solid lines); G2 = Dohuk (dashed lines); 0,1,2,3 correspond to categorical responses

Table S6.

Category Characteristic Curves for items with DIF in Rwanda

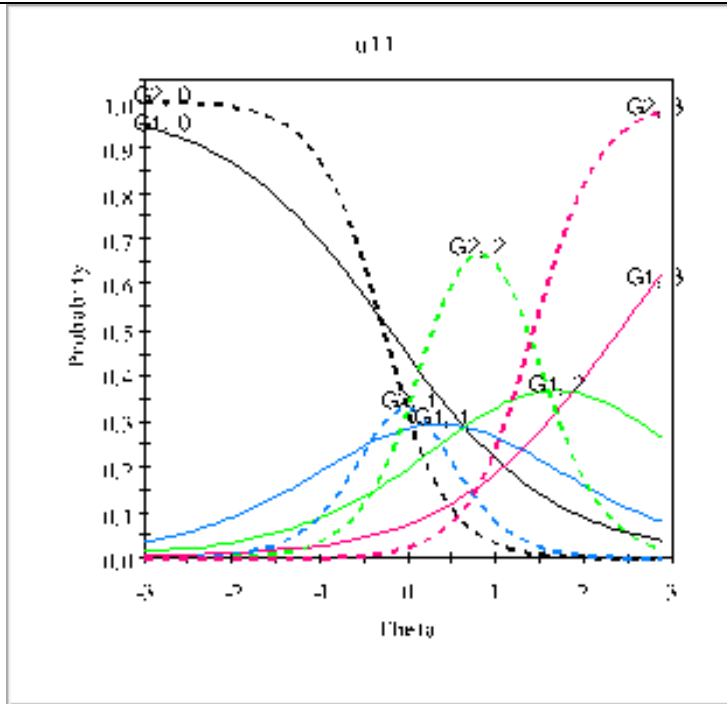

Trapped

G1 = All others (solid lines); G2 = Rwanda (dashed lines); 0,1,2,3 correspond to categorical responses

Table S7.

Category Characteristic Curves for items with DIF in Thailand

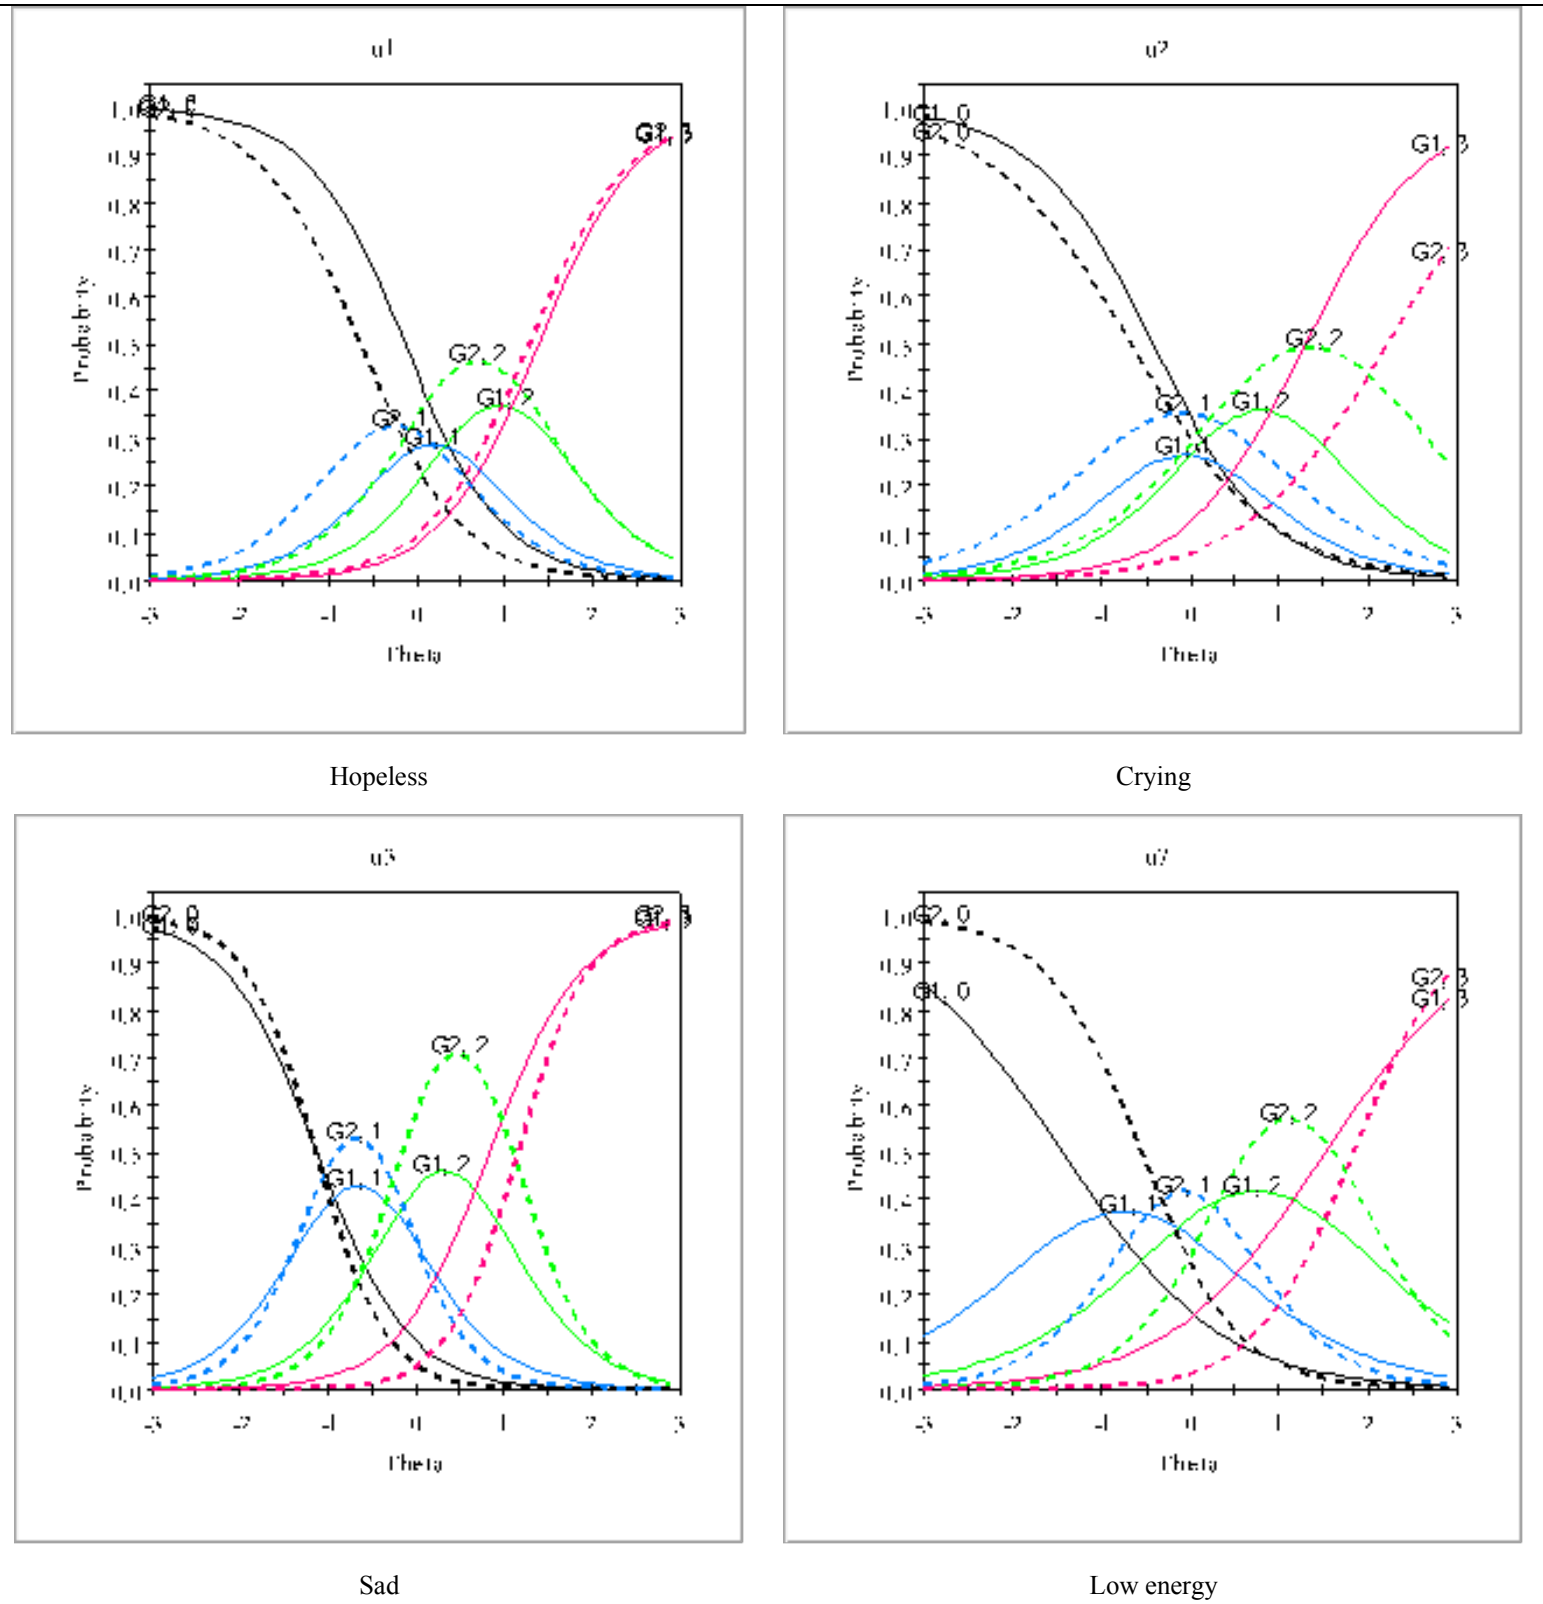

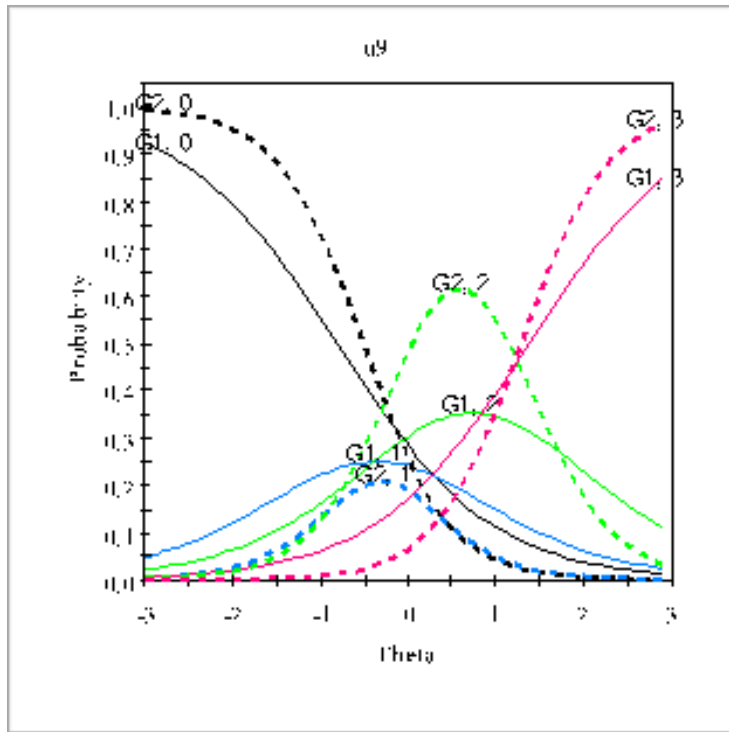

Sleep

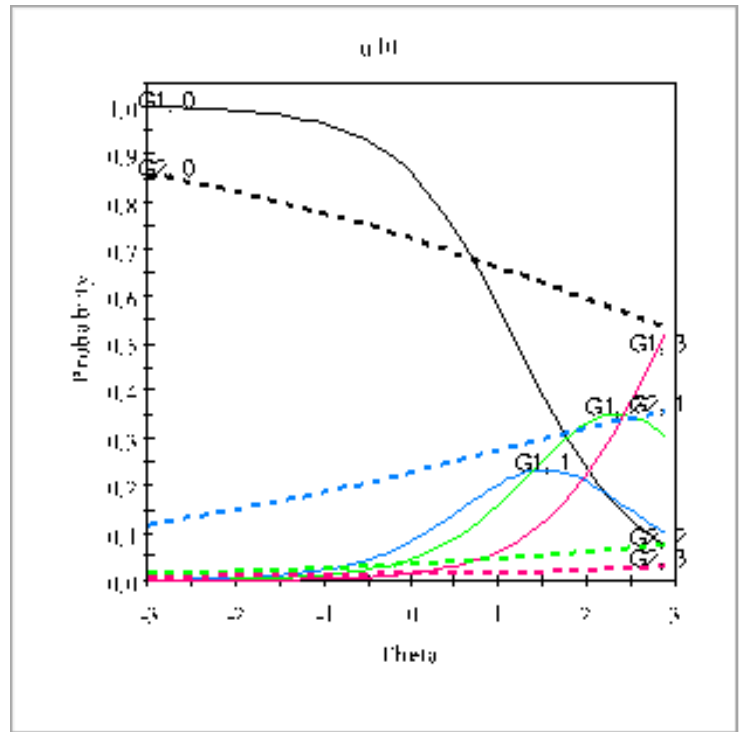

Suicide

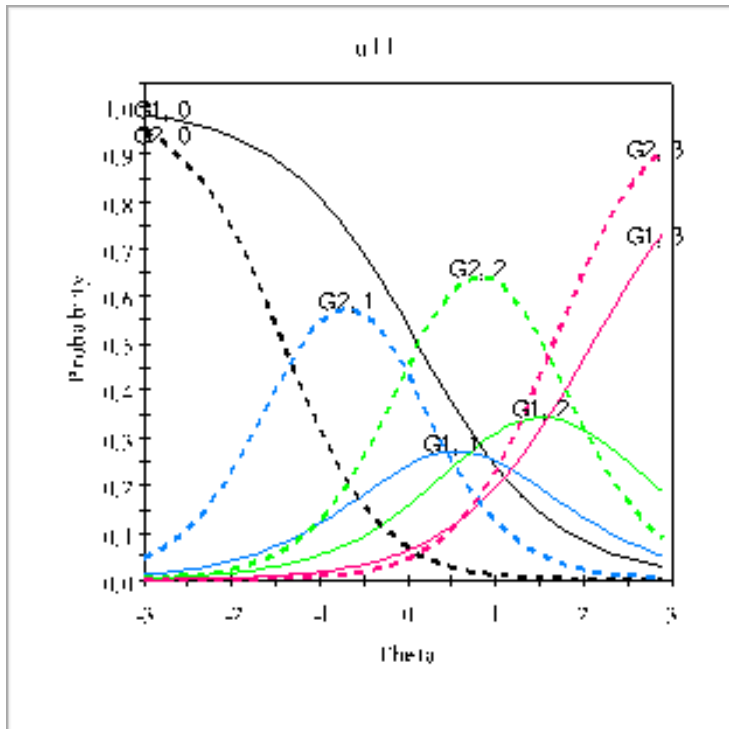

Trapped

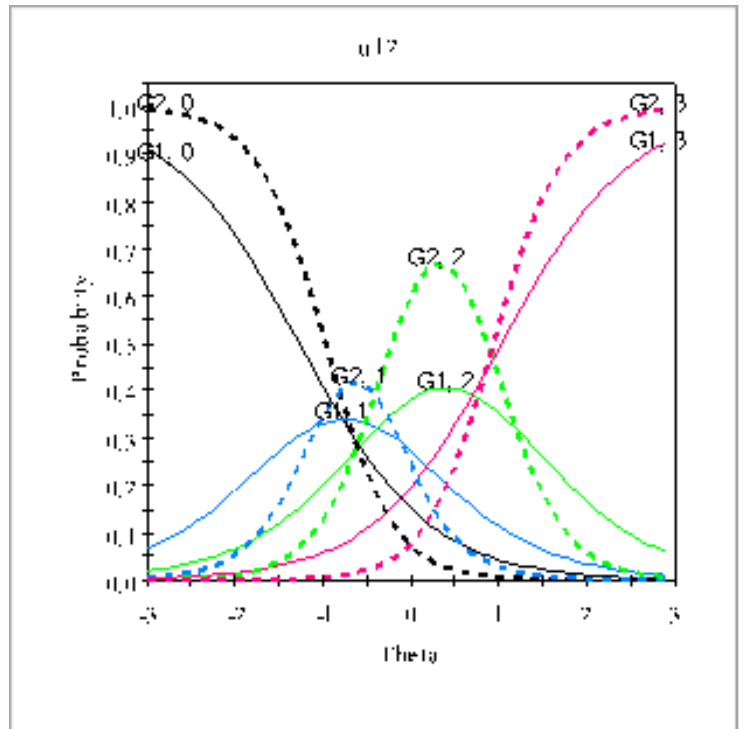

Worry

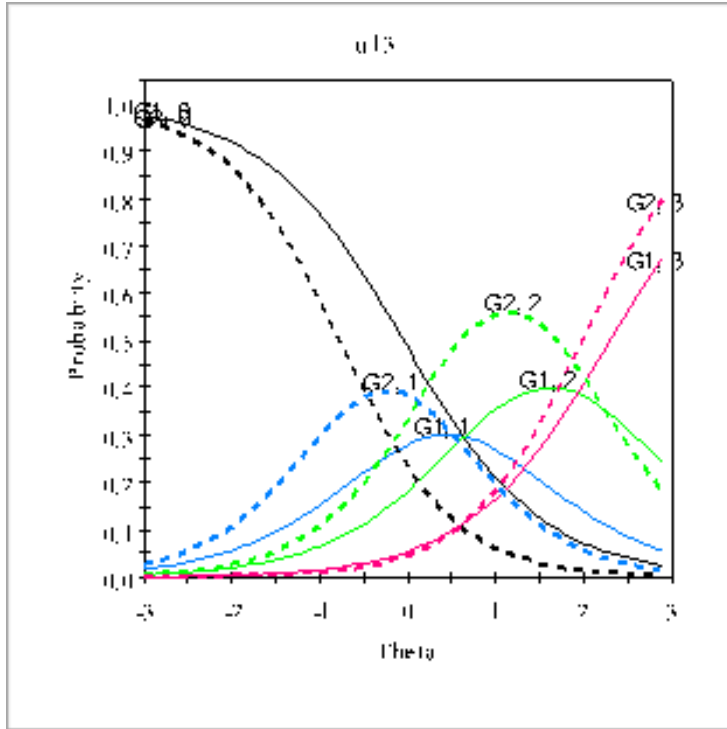

Self-blame

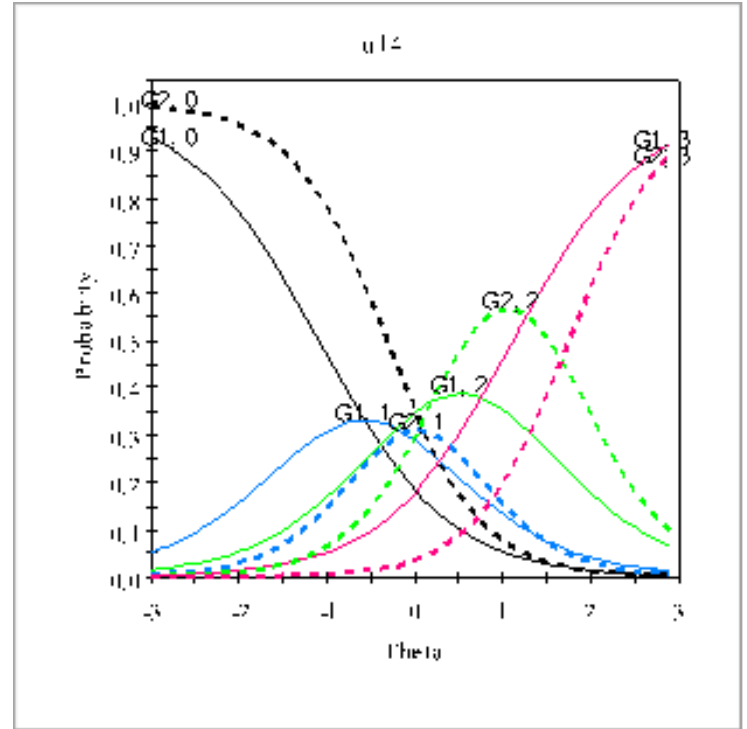

Effor

G1 = All others (solid lines); G2 = Thailand (dashed lines); 0,1,2,3 correspond to categorical responses

Table S8.

Category Characteristic Curves for items with DIF in Southern Iraq

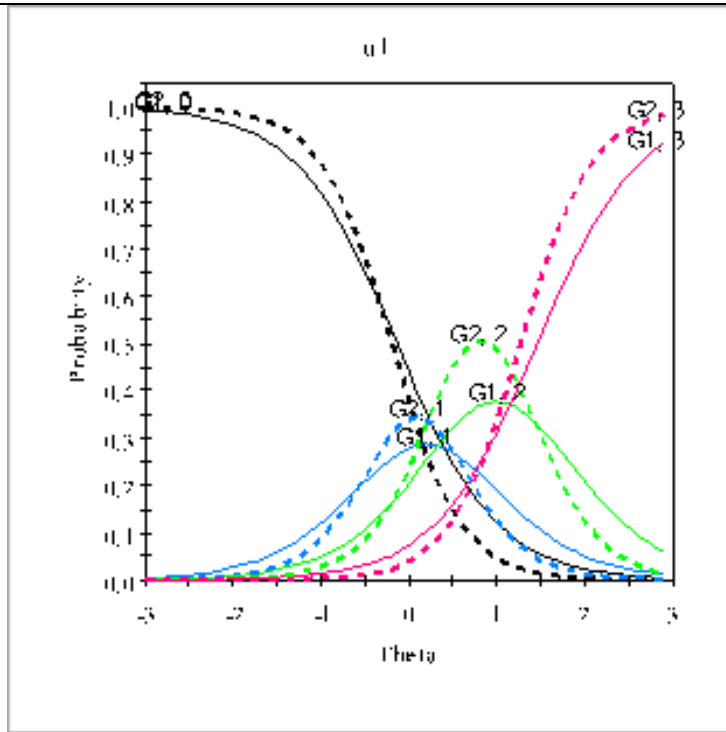

Hopeless

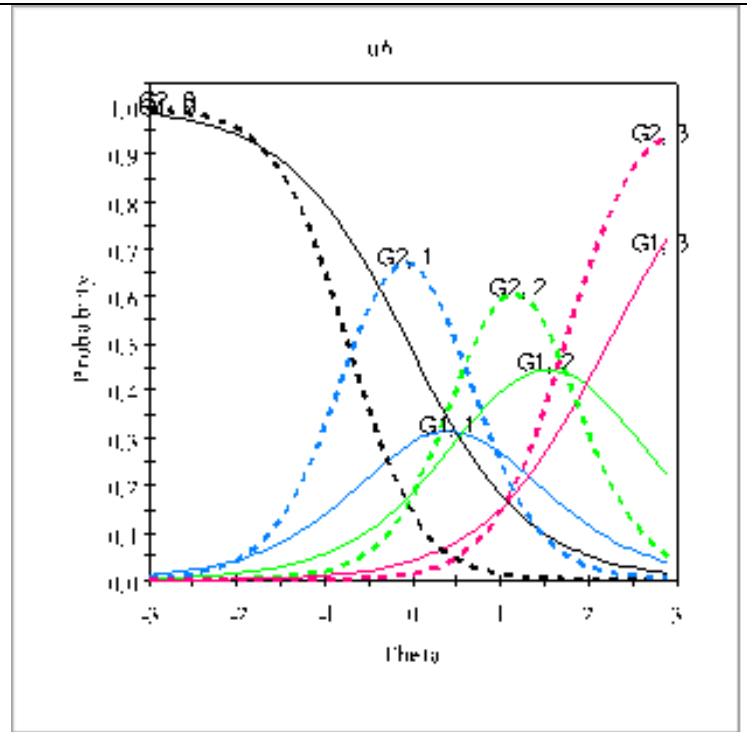

No interest

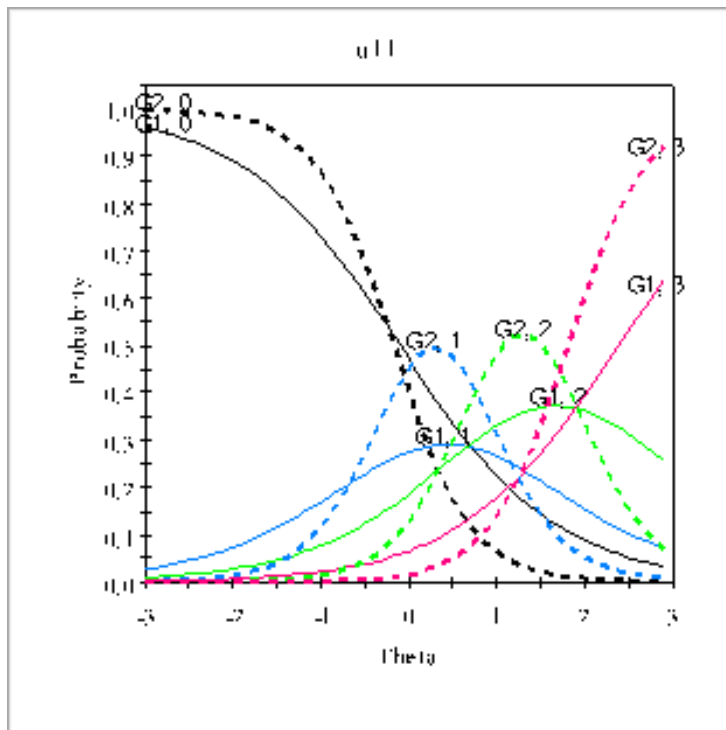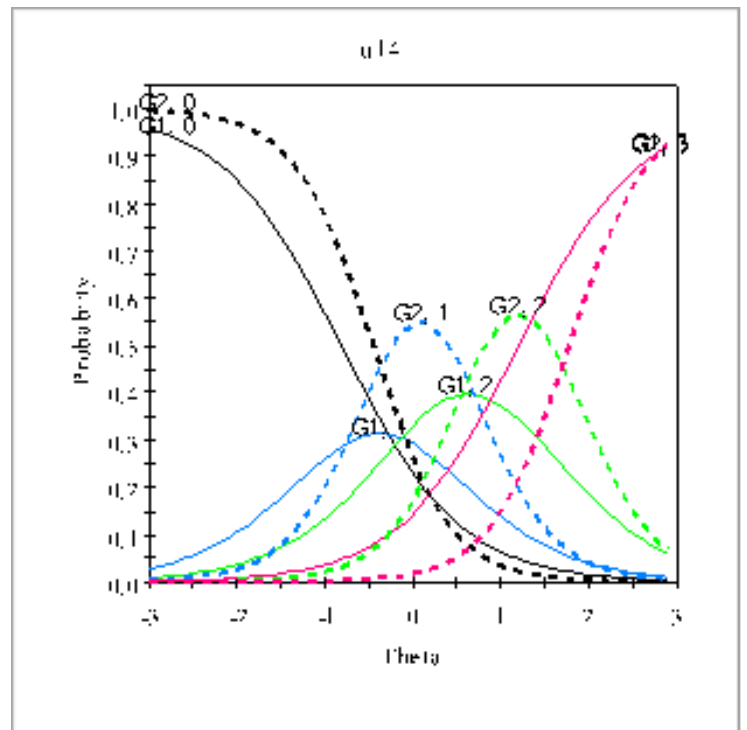



Trapped

Effort

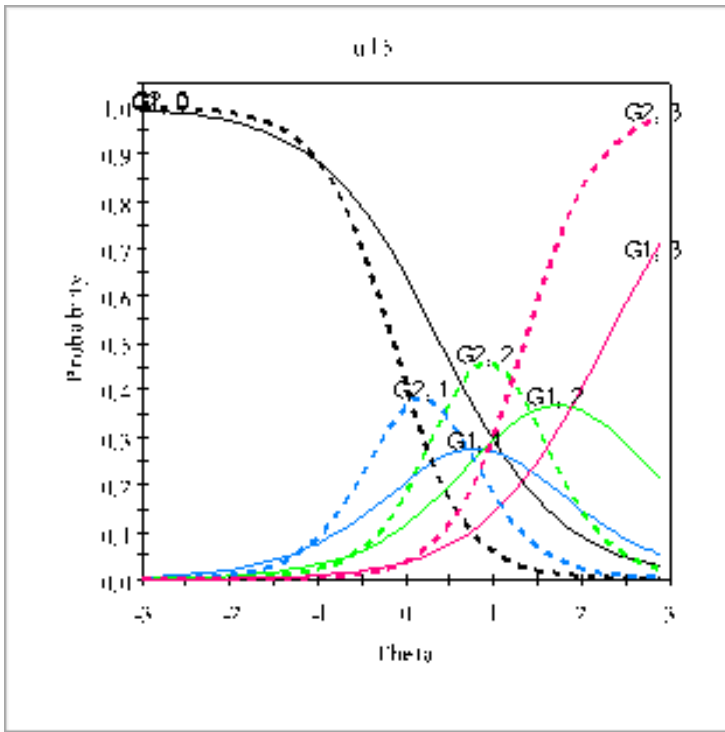

Worthlessness

---

G1 = All others (solid lines); G2 = Southern Iraq (dashed lines); 0,1,2,3 correspond to categorical responses

Table S9.

Category Characteristic Curves for items with DIF in Uganda

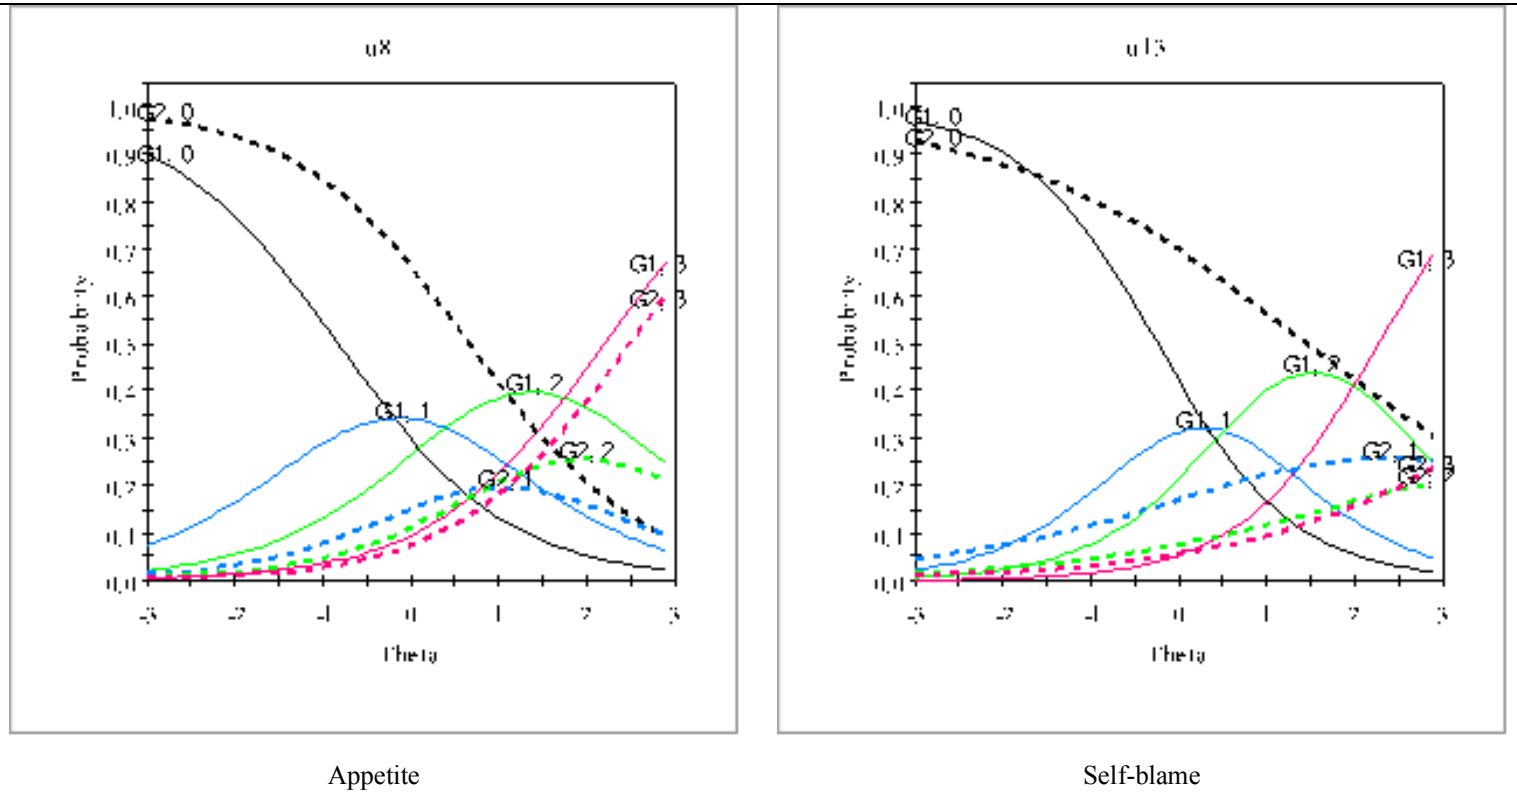

G1 = All others (solid lines); G2 = Uganda (dashed lines); 0,1,2,3 correspond to categorical responses

Table S10.

Category Characteristic Curves for items with DIF in Erbil/ Sulaimaniya

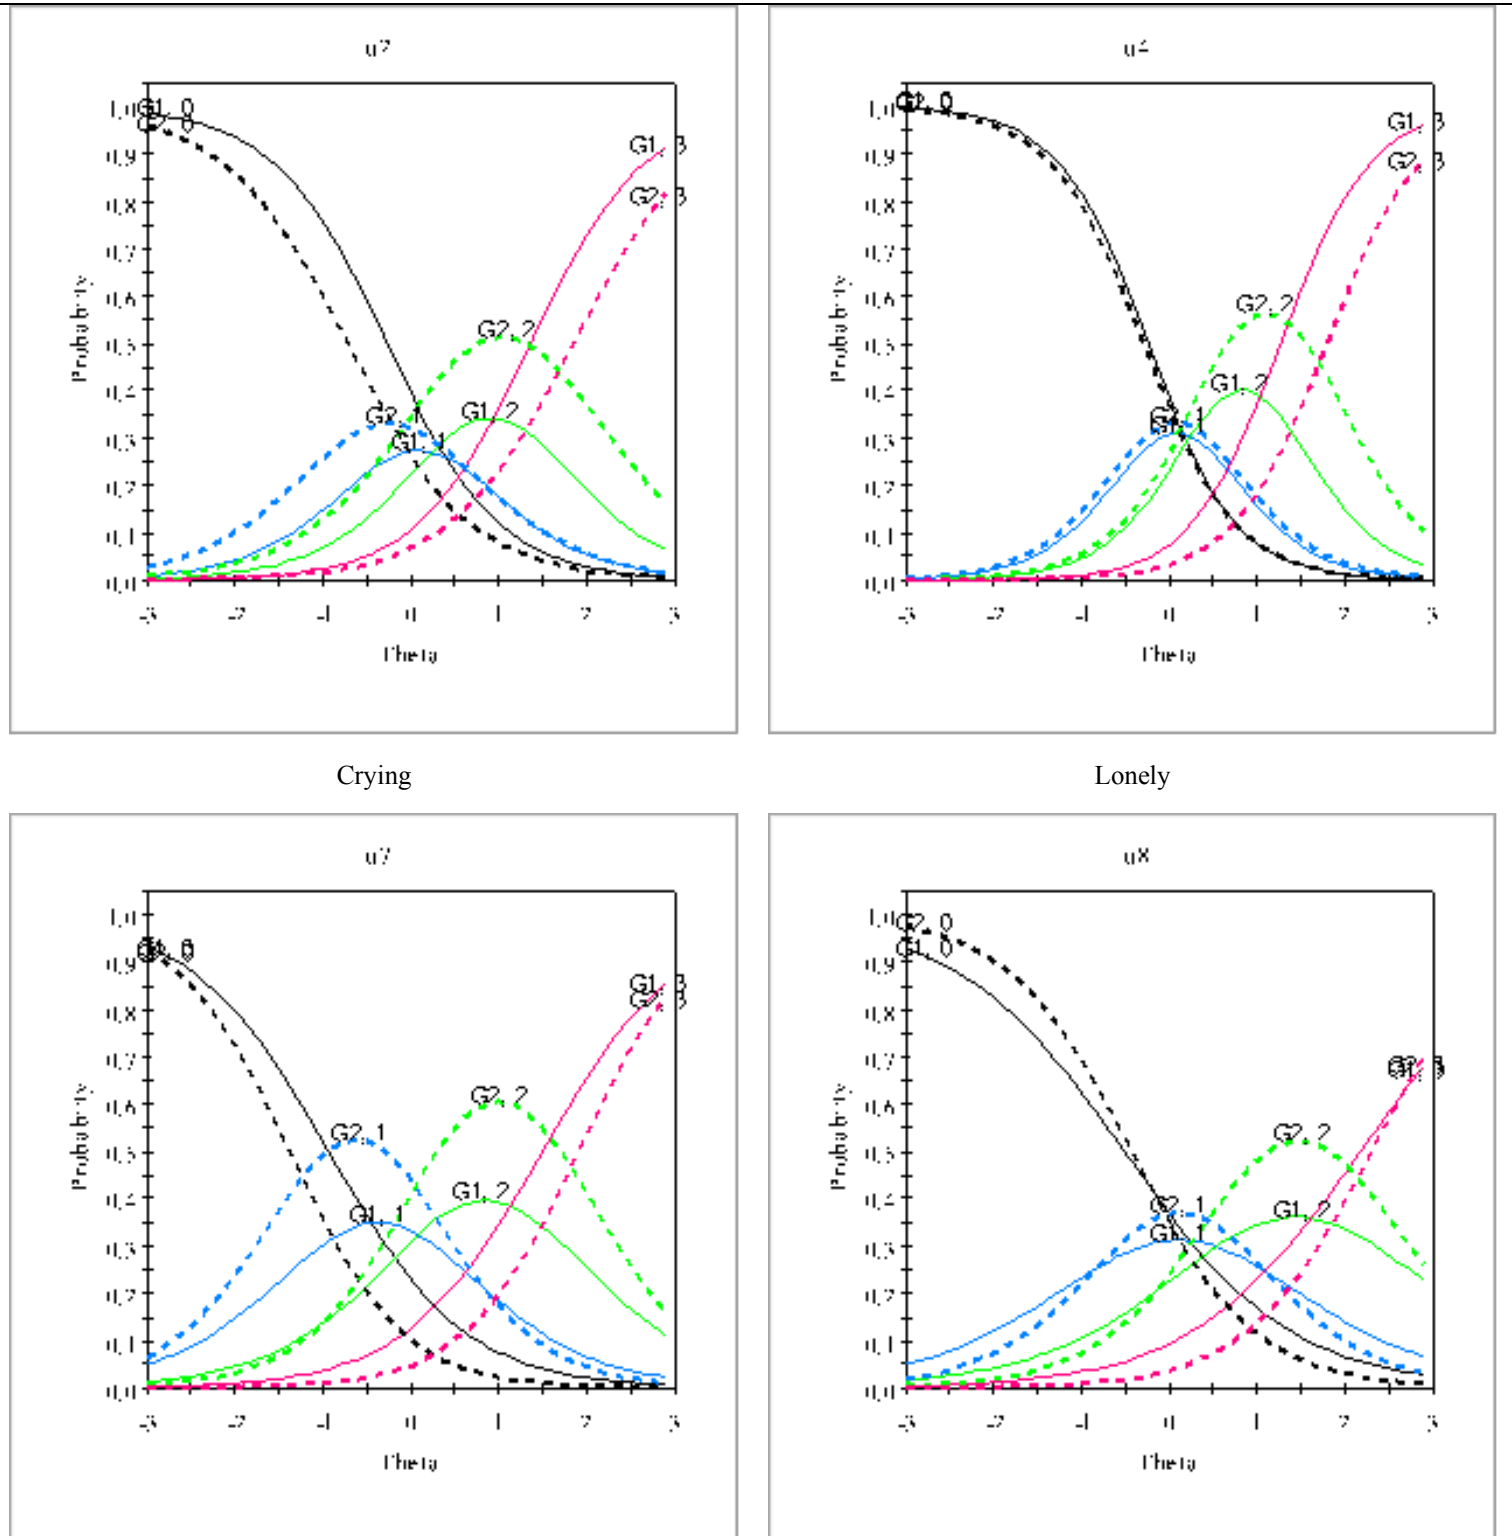

Low energy

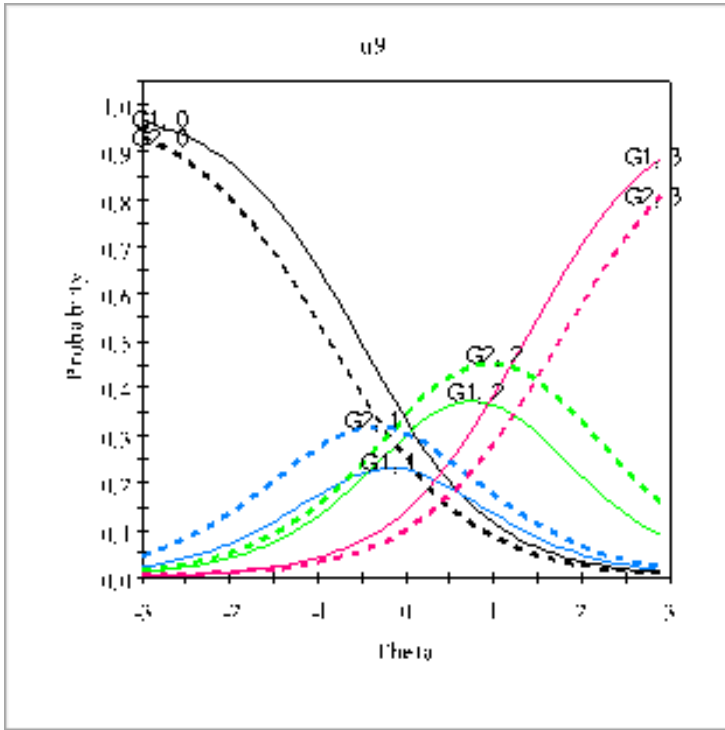

Appetite

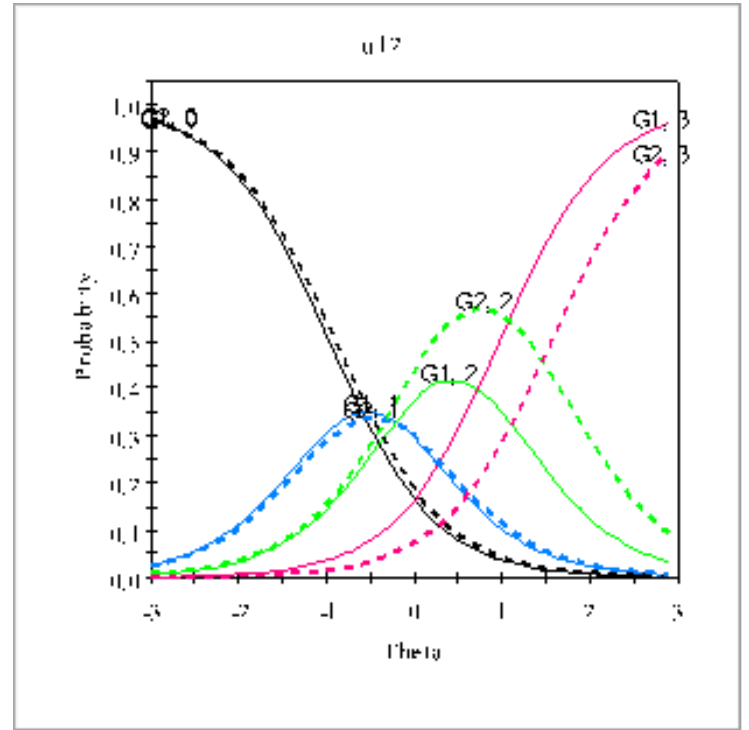

Sleep

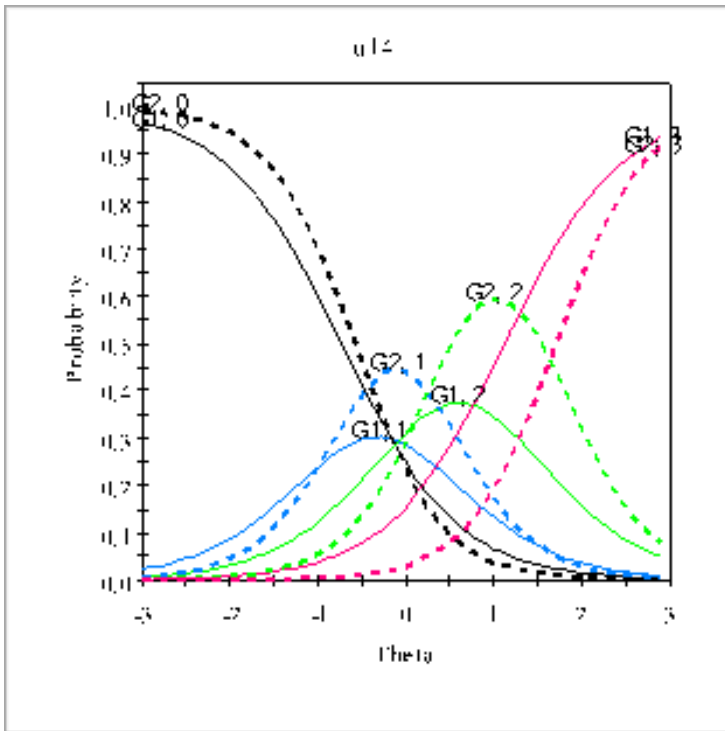

Worry

Effort

G1 = All others (solid lines); G2 = Erbil/ Sulaimaniya (dashed lines); 0,1,2,3 correspond to categorical responses
